# Supplementary material for: Scrutinising an inscrutable bark-nesting ant: Exploring cryptic diversity in the Rhopalomastix javana (Hymenoptera: Formicidae) complex using DNA barcodes, genome-wide MIG-seq and geometric morphometrics
Source: PeerJ journal article supplement (doi:10.7717/peerj.16416), 2023-11-16

**A**

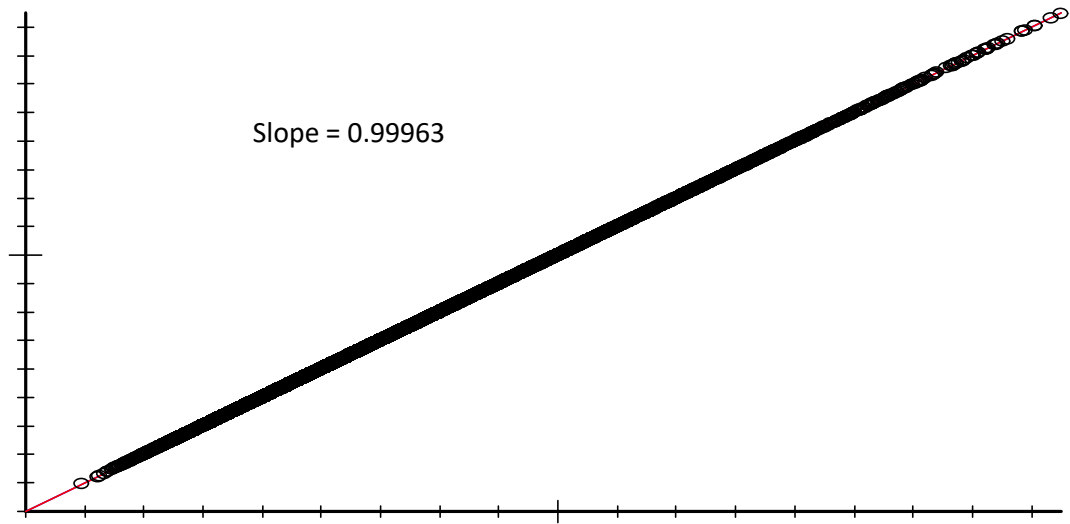

**B**

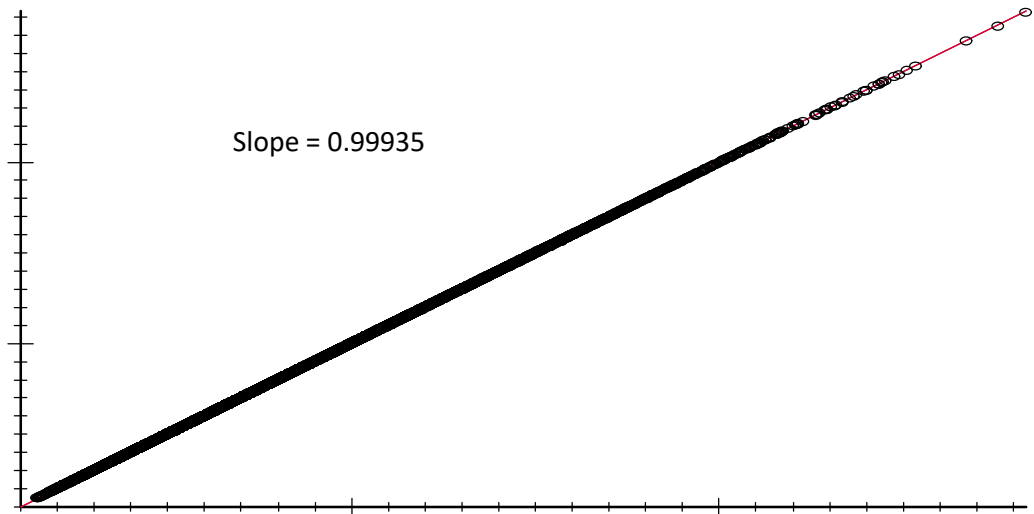

**C**

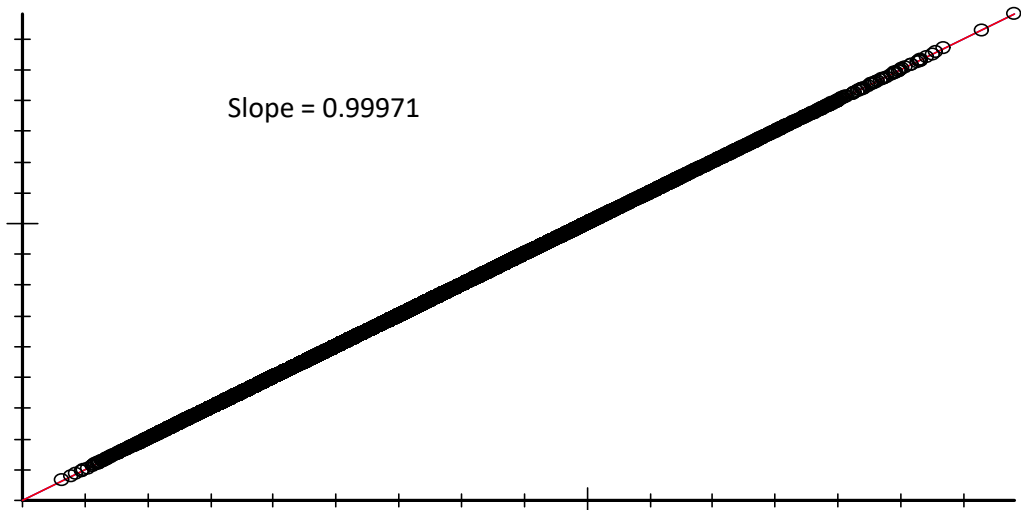

Supplement: Supplemental_Figure_S1.pdf [file Supplemental_Figure_S1.pdf]
